# Supplementary material for: Trace Conditioning in Drosophila Induces Associative Plasticity in Mushroom Body Kenyon Cells and Dopaminergic Neurons
Source: PubMed Central journal article supplement (PMC5476701; doi:10.3389/fncir.2017.00042), 2017-06-20
Supplement: Table1.pdf [file Table1.pdf]

## *Supplementary Material*

### **Trace conditioning in *Drosophila* induces associative plasticity in mushroom body Kenyon cells and dopaminergic neurons**

**Kristina V. Dylla<sup>1</sup>, Georg Raiser<sup>1</sup>, C. Giovanni Galizia<sup>1</sup>, Paul Szyszka<sup>1\*</sup>**

<sup>1</sup> University of Konstanz, Department of Biology, Neurobiology, 78457 Konstanz, Germany

**\*Correspondence:**

Paul Szyszka

paul.szyszka@uni-konstanz.de

**Supplementary Table 1: Results of the ANOVAs run on linear mixed-effect models.**

| Figure                                              | Model                                                                                                    | Compartment | Factor         | df1 | df2    | F        | p      |
|-----------------------------------------------------|----------------------------------------------------------------------------------------------------------|-------------|----------------|-----|--------|----------|--------|
| NA<br>(hemispheres:<br>KCs, paired,<br>shock)       | difference in response<br>strength ~ hemisphere,<br>random =<br>~1 fly/compartments/trial                | all         | (Intercept)    | 1   | 201    | 2.017    | 0.1571 |
|                                                     |                                                                                                          |             | hemisphere     | 1   | 201    | 3.479    | 0.0636 |
| NA<br>(hemispheres:<br>KCs,<br>unpaired,<br>shock)  |                                                                                                          | all         | (Intercept)    | 1   | 217    | 13.966   | 0.0002 |
|                                                     |                                                                                                          |             | hemisphere     | 1   | 217    | 3.077    | 0.0808 |
| NA<br>(hemispheres:<br>DANs, paired,<br>shock)      |                                                                                                          | all         | (Intercept)    | 1   | 315    | 1805.556 | <.0001 |
|                                                     |                                                                                                          |             | hemisphere     | 1   | 315    | 1.444    | 0.2304 |
| NA<br>(hemispheres:<br>DANs,<br>unpaired,<br>shock) |                                                                                                          | all         | (Intercept)    | 1   | 331    | 1257.702 | <.0001 |
|                                                     |                                                                                                          |             | hemisphere     | 1   | 331    | 4.718    | 0.0306 |
| NA<br>(hemispheres:<br>KCs, paired,<br>CS)          |                                                                                                          | all         | (Intercept)    | 1   | 403    | 55.757   | <.0001 |
|                                                     |                                                                                                          |             | hemisphere     | 1   | 403    | 24.21    | <.0001 |
| NA<br>(hemispheres:<br>KCs,<br>unpaired, CS)        |                                                                                                          | all         | (Intercept)    | 1   | 435    | 27.58    | <.0001 |
|                                                     |                                                                                                          |             | hemisphere     | 1   | 435    | 1.42     | 0.2341 |
| NA<br>(hemispheres:<br>DANs, paired,<br>CS)         |                                                                                                          | all         | (Intercept)    | 1   | 631    | 0.256    | 0.6133 |
|                                                     |                                                                                                          |             | hemisphere     | 1   | 631    | 3.816    | 0.0512 |
| NA<br>(hemispheres:<br>DANs,<br>unpaired, CS)       | all                                                                                                      | (Intercept) | 1              | 663 | 42.795 | <.0001   |        |
|                                                     |                                                                                                          | hemisphere  | 1              | 663 | 0.848  | 0.3574   |        |
| Figure 4B<br>(DANs) and<br>Suppl. Figure<br>3A      | training-induced difference<br>in response strength ~<br>trial*compartment*protoco<br>l, random = ~1 fly | all         | (Intercept)    | 1   | 1332   | 9.545    | 0.002  |
|                                                     |                                                                                                          |             | protocol       | 1   | 45     | 17.423   | 0.0001 |
|                                                     |                                                                                                          |             | trial          | 1   | 1332   | 36.507   | <.0001 |
|                                                     |                                                                                                          |             | compartment    | 11  | 383    | 7.781    | <.0001 |
|                                                     |                                                                                                          |             | protocol:trial | 1   | 1332   | 47.101   | <.0001 |

|                                                                                             |                |                            |     |        |        |        |
|---------------------------------------------------------------------------------------------|----------------|----------------------------|-----|--------|--------|--------|
|                                                                                             |                | protocol:compartment       | 11  | 383    | 3.988  | <.0001 |
|                                                                                             |                | trial:compartment          | 11  | 1332   | 2.027  | 0.0229 |
|                                                                                             |                | protocol:trial:compartment | 11  | 1332   | 1.261  | 0.2418 |
| training-induced difference<br>in response strength ~<br>trial*protocol, random =<br>~1 fly | $\gamma_1$     | (Intercept)                | 1   | 121    | 3.334  | 0.0703 |
|                                                                                             |                | protocol                   | 1   | 39     | 20.173 | 0.0001 |
|                                                                                             |                | trial                      | 1   | 121    | 0.629  | 0.4293 |
|                                                                                             |                | protocol:trial             | 1   | 121    | 8.181  | 0.005  |
|                                                                                             | $\gamma_2$     | (Intercept)                | 1   | 139    | 18.897 | <.0001 |
|                                                                                             |                | protocol                   | 1   | 45     | 6.901  | 0.0117 |
|                                                                                             |                | trial                      | 1   | 139    | 9.198  | 0.0029 |
|                                                                                             |                | protocol:trial             | 1   | 139    | 9.386  | 0.0026 |
|                                                                                             | $\gamma_3$     | (Intercept)                | 1   | 133    | 3.211  | 0.0754 |
|                                                                                             |                | protocol                   | 1   | 43     | 6.438  | 0.0149 |
|                                                                                             |                | trial                      | 1   | 133    | 1.518  | 0.2201 |
|                                                                                             |                | protocol:trial             | 1   | 133    | 7.395  | 0.0074 |
|                                                                                             | $\gamma_4$     | (Intercept)                | 1   | 133    | 0.01   | 0.919  |
|                                                                                             |                | protocol                   | 1   | 43     | 18.432 | 0.0001 |
|                                                                                             |                | trial                      | 1   | 133    | 0.63   | 0.4286 |
|                                                                                             |                | protocol:trial             | 1   | 133    | 8.579  | 0.004  |
|                                                                                             | $\gamma_5$     | (Intercept)                | 1   | 139    | 0.284  | 0.5947 |
|                                                                                             |                | protocol                   | 1   | 45     | 20.412 | <.0001 |
|                                                                                             |                | trial                      | 1   | 139    | 1.349  | 0.2474 |
|                                                                                             |                | protocol:trial             | 1   | 139    | 7.628  | 0.0065 |
|                                                                                             | $\beta_1$      | (Intercept)                | 1   | 109    | 14.659 | 0.0002 |
|                                                                                             |                | protocol                   | 1   | 35     | 5.592  | 0.0237 |
|                                                                                             |                | trial                      | 1   | 109    | 37.768 | <.0001 |
|                                                                                             |                | protocol:trial             | 1   | 109    | 1.745  | 0.1893 |
|                                                                                             | $\beta_2$      | (Intercept)                | 1   | 139    | 28.955 | <.0001 |
|                                                                                             |                | protocol                   | 1   | 45     | 33.183 | <.0001 |
|                                                                                             |                | trial                      | 1   | 139    | 4.3    | 0.04   |
|                                                                                             |                | protocol:trial             | 1   | 139    | 11.866 | 0.0008 |
| junction                                                                                    | (Intercept)    | 1                          | 115 | 1.158  | 0.2841 |        |
|                                                                                             | protocol       | 1                          | 37  | 19.272 | 0.0001 |        |
|                                                                                             | trial          | 1                          | 115 | 1.461  | 0.2293 |        |
|                                                                                             | protocol:trial | 1                          | 115 | 6.744  | 0.0106 |        |
| $\alpha_1/\alpha_1$                                                                         | (Intercept)    | 1                          | 25  | 0.338  | 0.5664 |        |
|                                                                                             | protocol       | 1                          | 7   | 2.658  | 0.147  |        |
|                                                                                             | trial          | 1                          | 25  | 0.004  | 0.9512 |        |
|                                                                                             | protocol:trial | 1                          | 25  | 1.014  | 0.3235 |        |
| FB1                                                                                         | (Intercept)    | 1                          | 109 | 0.328  | 0.5682 |        |
|                                                                                             | protocol       | 1                          | 35  | 0.109  | 0.7429 |        |
|                                                                                             | trial          | 1                          | 109 | 2.152  | 0.1453 |        |
|                                                                                             | protocol:trial | 1                          | 109 | 1.344  | 0.2489 |        |

|                                               |                                                                                                          |            |                            |        |        |          |        |
|-----------------------------------------------|----------------------------------------------------------------------------------------------------------|------------|----------------------------|--------|--------|----------|--------|
|                                               |                                                                                                          | FB2        | (Intercept)                | 1      | 97     | 1.134    | 0.2896 |
|                                               |                                                                                                          |            | protocol                   | 1      | 31     | 0.184    | 0.6708 |
|                                               |                                                                                                          |            | trial                      | 1      | 97     | 4.655    | 0.0334 |
|                                               |                                                                                                          |            | protocol:trial             | 1      | 97     | 1.74     | 0.1903 |
|                                               |                                                                                                          | EB         | (Intercept)                | 1      | 73     | 0.529    | 0.4692 |
|                                               |                                                                                                          |            | protocol                   | 1      | 23     | 0.004    | 0.9531 |
|                                               |                                                                                                          |            | trial                      | 1      | 73     | 3.332    | 0.072  |
|                                               |                                                                                                          |            | protocol:trial             | 1      | 73     | 0.194    | 0.6612 |
| Figure 4C and<br>Suppl. Figure<br>3C          | training-induced difference<br>in response strength ~<br>trial*compartment*protoco<br>l, random = ~1 fly | all        | (Intercept)                | 1      | 428    | 2441.799 | <.0001 |
|                                               |                                                                                                          |            | protocol                   | 1      | 45     | 3.174    | 0.0816 |
|                                               |                                                                                                          |            | trial                      | 1      | 428    | 2.908    | 0.0889 |
|                                               |                                                                                                          |            | compartment                | 11     | 383    | 12.06    | <.0001 |
|                                               |                                                                                                          |            | protocol:trial             | 1      | 428    | 0.03     | 0.8637 |
|                                               |                                                                                                          |            | protocol:compartment       | 11     | 383    | 0.939    | 0.5025 |
|                                               |                                                                                                          |            | trial:compartment          | 11     | 428    | 0.37     | 0.9672 |
|                                               |                                                                                                          |            | protocol:trial:compartment | 11     | 428    | 0.67     | 0.7668 |
| Figure 4B<br>(KCs) and<br>Suppl. Figure<br>3B | training-induced difference<br>in response strength ~<br>trial*compartment*protoco<br>l, random = ~1 fly | all        | (Intercept)                | 1      | 986    | 87.293   | <.0001 |
|                                               |                                                                                                          |            | protocol                   | 1      | 39     | 1.469    | 0.2328 |
|                                               |                                                                                                          |            | trial                      | 1      | 986    | 30.548   | <.0001 |
|                                               |                                                                                                          |            | compartment                | 10     | 275    | 17.36    | <.0001 |
|                                               |                                                                                                          |            | protocol:trial             | 1      | 986    | 5.932    | 0.015  |
|                                               |                                                                                                          |            | protocol:compartment       | 10     | 275    | 5.705    | <.0001 |
|                                               |                                                                                                          |            | trial:compartment          | 10     | 986    | 1.416    | 0.1678 |
|                                               |                                                                                                          |            | protocol:trial:compartment | 10     | 986    | 0.802    | 0.6268 |
|                                               | training-induced difference<br>in response strength ~<br>trial*protocol, random =<br>~1 fly              | $\gamma_1$ | (Intercept)                | 1      | 64     | 1.424    | 0.2371 |
|                                               |                                                                                                          |            | protocol                   | 1      | 20     | 3.713    | 0.0683 |
|                                               |                                                                                                          |            | trial                      | 1      | 64     | 5.685    | 0.0201 |
|                                               |                                                                                                          |            | protocol:trial             | 1      | 64     | 1.682    | 0.1993 |
|                                               |                                                                                                          | $\gamma_2$ | (Intercept)                | 1      | 118    | 116.922  | <.0001 |
|                                               |                                                                                                          |            | protocol                   | 1      | 38     | 0.006    | 0.9364 |
|                                               |                                                                                                          |            | trial                      | 1      | 118    | 8.429    | 0.0044 |
|                                               |                                                                                                          |            | protocol:trial             | 1      | 118    | 0.366    | 0.5465 |
|                                               |                                                                                                          | $\gamma_3$ | (Intercept)                | 1      | 121    | 151.995  | <.0001 |
|                                               |                                                                                                          |            | protocol                   | 1      | 39     | 1.296    | 0.262  |
|                                               |                                                                                                          |            | trial                      | 1      | 121    | 2.102    | 0.1497 |
|                                               |                                                                                                          |            | protocol:trial             | 1      | 121    | 0.145    | 0.7045 |
| $\gamma_4$                                    | (Intercept)                                                                                              | 1          | 121                        | 41.275 | <.0001 |          |        |
|                                               | protocol                                                                                                 | 1          | 39                         | 0.248  | 0.6215 |          |        |
|                                               | trial                                                                                                    | 1          | 121                        | 6.36   | 0.013  |          |        |
|                                               | protocol:trial                                                                                           | 1          | 121                        | 0.119  | 0.7306 |          |        |
| $\gamma_5$                                    | (Intercept)                                                                                              | 1          | 121                        | 55.269 | <.0001 |          |        |
|                                               | protocol                                                                                                 | 1          | 39                         | 1.107  | 0.2992 |          |        |

|                  |                                                                                                |                    |                            |    |      |          |        |
|------------------|------------------------------------------------------------------------------------------------|--------------------|----------------------------|----|------|----------|--------|
|                  |                                                                                                |                    | trial                      | 1  | 121  | 18.424   | <.0001 |
|                  |                                                                                                |                    | protocol:trial             | 1  | 121  | 0.002    | 0.9686 |
|                  |                                                                                                | $\beta'1$          | (Intercept)                | 1  | 76   | 28.149   | <.0001 |
|                  |                                                                                                |                    | protocol                   | 1  | 24   | 6.114    | 0.0209 |
|                  |                                                                                                |                    | trial                      | 1  | 76   | 0.764    | 0.3847 |
|                  |                                                                                                |                    | protocol:trial             | 1  | 76   | 2.45     | 0.1217 |
|                  |                                                                                                | $\beta'2$          | (Intercept)                | 1  | 121  | 35.53    | <.0001 |
|                  |                                                                                                |                    | protocol                   | 1  | 39   | 11.52    | 0.0016 |
|                  |                                                                                                |                    | trial                      | 1  | 121  | 1.686    | 0.1966 |
|                  |                                                                                                |                    | protocol:trial             | 1  | 121  | 4.357    | 0.039  |
|                  |                                                                                                | junction           | (Intercept)                | 1  | 73   | 7.232    | 0.0089 |
|                  |                                                                                                |                    | protocol                   | 1  | 23   | 7.331    | 0.0126 |
|                  |                                                                                                |                    | trial                      | 1  | 73   | 3.076    | 0.0836 |
|                  |                                                                                                |                    | protocol:trial             | 1  | 73   | 4.958    | 0.0291 |
|                  |                                                                                                | $\alpha1/\alpha'1$ | (Intercept)                | 1  | 43   | 65.492   | <.0001 |
|                  |                                                                                                |                    | protocol                   | 1  | 13   | 2.262    | 0.1565 |
|                  |                                                                                                |                    | trial                      | 1  | 43   | 0.997    | 0.3235 |
|                  |                                                                                                |                    | protocol:trial             | 1  | 43   | 2.224    | 0.1432 |
|                  |                                                                                                | IPCs               | (Intercept)                | 1  | 52   | 0.197    | 0.6592 |
|                  |                                                                                                |                    | protocol                   | 1  | 16   | 1.923    | 0.1845 |
|                  |                                                                                                |                    | trial                      | 1  | 52   | 2.356    | 0.1309 |
|                  |                                                                                                |                    | protocol:trial             | 1  | 52   | 0.282    | 0.5977 |
|                  |                                                                                                | $\beta2$           | (Intercept)                | 1  | 76   | 9.119    | 0.0034 |
|                  |                                                                                                |                    | protocol                   | 1  | 24   | 2.28     | 0.1441 |
|                  |                                                                                                |                    | trial                      | 1  | 76   | 0.444    | 0.5073 |
|                  |                                                                                                |                    | protocol:trial             | 1  | 76   | 1.587    | 0.2116 |
| Suppl. Figure 3D | training-induced difference in response strength ~ trial*compartment*protocol, random = ~1 fly | all                | (Intercept)                | 1  | 314  | 13.732   | 0.0002 |
|                  |                                                                                                |                    | protocol                   | 1  | 39   | 0.847    | 0.3631 |
|                  |                                                                                                |                    | trial                      | 1  | 314  | 0.288    | 0.592  |
|                  |                                                                                                |                    | compartment                | 10 | 275  | 3.912    | 0.0001 |
|                  |                                                                                                |                    | protocol:trial             | 1  | 314  | 0.151    | 0.6979 |
|                  |                                                                                                |                    | protocol:compartment       | 10 | 275  | 0.442    | 0.9251 |
|                  |                                                                                                |                    | trial:compartment          | 10 | 314  | 1.869    | 0.0489 |
|                  |                                                                                                |                    | protocol:trial:compartment | 10 | 314  | 0.413    | 0.9401 |
| Suppl. Figure 4C | electric current strength ~ pulse no.*trial*group, random = ~1 fly                             | NA                 | (Intercept)                | 1  | 1716 | 2254.346 | <.0001 |
|                  |                                                                                                |                    | pulse no.                  | 1  | 1716 | 17.8124  | <.0001 |
|                  |                                                                                                |                    | group                      | 3  | 60   | 0.8693   | 0.4621 |
|                  |                                                                                                |                    | trial                      | 1  | 1716 | 0.4487   | 0.503  |
|                  |                                                                                                |                    | pulse no.:group            | 3  | 1716 | 4.6947   | 0.0029 |
|                  |                                                                                                |                    | pulse no.:trial            | 1  | 1716 | 1.8692   | 0.1717 |
|                  |                                                                                                |                    | group:trial                | 3  | 1716 | 1.2141   | 0.3031 |
|                  |                                                                                                |                    | pulse no.:group:trial      | 3  | 1716 | 1.7119   | 0.1626 |

|                                              |                                                                                 |                       |                                    |        |        |           |        |
|----------------------------------------------|---------------------------------------------------------------------------------|-----------------------|------------------------------------|--------|--------|-----------|--------|
| Suppl. Figure 5B                             | response strength ~ protocol*trial* concentration* compartment, random = ~1 fly | $\gamma$ and $\beta'$ | (Intercept)                        | 1      | 436    | 2899328.4 | <.0001 |
|                                              |                                                                                 |                       | protocol                           | 1      | 10     | 0.7       | 0.4207 |
|                                              |                                                                                 |                       | trial                              | 1      | 436    | 0.1       | 0.793  |
|                                              |                                                                                 |                       | concentration                      | 1      | 436    | 10.6      | 0.0012 |
|                                              |                                                                                 |                       | compartment                        | 7      | 436    | 164.5     | <.0001 |
|                                              |                                                                                 |                       | protocol:trial                     | 1      | 436    | 0.1       | 0.7025 |
|                                              |                                                                                 |                       | protocol:concentration             | 1      | 436    | 1.3       | 0.249  |
|                                              |                                                                                 |                       | trial:concentration                | 1      | 436    | 2.3       | 0.1307 |
|                                              |                                                                                 |                       | protocol:compartment               | 7      | 436    | 15.7      | <.0001 |
|                                              |                                                                                 |                       | trial:compartment                  | 7      | 436    | 0.3       | 0.9456 |
|                                              |                                                                                 |                       | concentration:compartment          | 7      | 436    | 0.2       | 0.9939 |
|                                              |                                                                                 |                       | protocol:trial:concentration       | 1      | 436    | 0         | 0.8956 |
|                                              |                                                                                 |                       | protocol:trial:compartment         | 7      | 436    | 0.2       | 0.9774 |
|                                              |                                                                                 |                       | protocol:concentration:compartment | 7      | 436    | 0.1       | 0.9982 |
| trial:concentration:compartment              | 7                                                                               | 436                   | 0                                  | 0.9999 |        |           |        |
| protocol:trial:concentration:compartment     | 7                                                                               | 436                   | 0.1                                | 0.9998 |        |           |        |
| Figure 5B (CS vs. 1 <sup>st</sup> CS)        | angle between 9D-vectors ~ trial*protocol, random = ~1 fly                      | 9 shared              | (Intercept)                        | 1      | 139    | 4.863     | 0.0291 |
|                                              |                                                                                 |                       | protocol                           | 1      | 45     | 8.249     | 0.0062 |
|                                              |                                                                                 |                       | trial                              | 1      | 139    | 9.909     | 0.002  |
|                                              |                                                                                 |                       | protocol:trial                     | 1      | 139    | 1.062     | 0.3046 |
| Figure 5B (US vs. 1 <sup>st</sup> US)        |                                                                                 | 9 shared              | (Intercept)                        | 1      | 92     | 597.721   | <.0001 |
|                                              |                                                                                 |                       | protocol                           | 1      | 45     | 0.109     | 0.7429 |
|                                              |                                                                                 |                       | trial                              | 1      | 92     | 4.454     | 0.0375 |
|                                              |                                                                                 |                       | protocol:trial                     | 1      | 92     | 0.105     | 0.747  |
| Figure 5B (CS vs. mean US)                   |                                                                                 | 9 shared              | (Intercept)                        | 1      | 231    | 20.234    | <.0001 |
|                                              |                                                                                 |                       | protocol                           | 1      | 45     | 24.887    | <.0001 |
|                                              |                                                                                 |                       | trial                              | 1      | 231    | 11.234    | 0.0009 |
|                                              |                                                                                 |                       | protocol:trial                     | 1      | 231    | 5.297     | 0.0223 |
| Suppl. Figure 6A (CS vs. 1 <sup>st</sup> CS) |                                                                                 | 9 shared              | (Intercept)                        | 1      | 121    | 222.493   | <.0001 |
|                                              |                                                                                 |                       | protocol                           | 1      | 39     | 1.528     | 0.2238 |
|                                              |                                                                                 |                       | trial                              | 1      | 121    | 13.923    | 0.0003 |
|                                              |                                                                                 |                       | protocol:trial                     | 1      | 121    | 3.569     | 0.0613 |
| Suppl. Figure 6A (US vs. 1 <sup>st</sup> US) | 9 shared                                                                        | (Intercept)           | 1                                  | 80     | 0.348  | 0.557     |        |
|                                              |                                                                                 | protocol              | 1                                  | 39     | 0.881  | 0.3538    |        |
|                                              |                                                                                 | trial                 | 1                                  | 80     | 2.433  | 0.1227    |        |
|                                              |                                                                                 | protocol:trial        | 1                                  | 80     | 0.444  | 0.5071    |        |
| Suppl. Figure 6A (CS vs. mean US)            | 9 shared                                                                        | (Intercept)           | 1                                  | 201    | 12.777 | 0.0004    |        |
|                                              |                                                                                 | protocol              | 1                                  | 39     | 0.133  | 0.7172    |        |

|                                              |                                                                         |             |                |        |         |          |        |
|----------------------------------------------|-------------------------------------------------------------------------|-------------|----------------|--------|---------|----------|--------|
|                                              |                                                                         |             | trial          | 1      | 201     | 5.661    | 0.0183 |
|                                              |                                                                         |             | protocol:trial | 1      | 201     | 0.197    | 0.6573 |
| Suppl. Figure 6B (CS vs. 1 <sup>st</sup> CS) | Euclidean distance between 9D-vectors ~ trial*protocol, random = ~1 fly | 9 shared    | (Intercept)    | 1      | 139     | 271.208  | <.0001 |
| protocol                                     |                                                                         |             | 1              | 45     | 0.547   | 0.4632   |        |
| trial                                        |                                                                         |             | 1              | 139    | 11.035  | 0.0011   |        |
| protocol:trial                               |                                                                         |             | 1              | 139    | 2.011   | 0.1583   |        |
| Suppl. Figure 6B (US vs. 1 <sup>st</sup> US) |                                                                         | 9 shared    | (Intercept)    | 1      | 92      | 114.353  | <.0001 |
| protocol                                     |                                                                         |             | 1              | 45     | 0.708   | 0.4044   |        |
| trial                                        |                                                                         |             | 1              | 92     | 0.963   | 0.3288   |        |
| protocol:trial                               |                                                                         |             | 1              | 92     | 0.474   | 0.4925   |        |
| Suppl. Figure 6B (CS vs. mean US)            |                                                                         | 9 shared    | (Intercept)    | 1      | 233     | 88.191   | <.0001 |
| protocol                                     |                                                                         |             | 1              | 45     | 11.317  | 0.0015   |        |
| trial                                        |                                                                         |             | 1              | 233    | 9.828   | 0.0019   |        |
| protocol:trial                               |                                                                         |             | 1              | 233    | 7.336   | 0.0072   |        |
| Suppl. Figure 6C (CS vs. 1 <sup>st</sup> CS) |                                                                         | 9 shared    | (Intercept)    | 1      | 121     | 321.995  | <.0001 |
| protocol                                     |                                                                         |             | 1              | 39     | 0.098   | 0.7548   |        |
| trial                                        |                                                                         |             | 1              | 121    | 13.216  | 0.0004   |        |
| protocol:trial                               |                                                                         |             | 1              | 121    | 0.503   | 0.4792   |        |
| Suppl. Figure 6C (US vs. 1 <sup>st</sup> US) |                                                                         | 9 shared    | (Intercept)    | 1      | 80      | 1433.396 | <.0001 |
| protocol                                     |                                                                         |             | 1              | 39     | 0.333   | 0.5667   |        |
| trial                                        |                                                                         |             | 1              | 80     | 5.195   | 0.0253   |        |
| protocol:trial                               |                                                                         |             | 1              | 80     | 0.275   | 0.6010   |        |
| Suppl. Figure 6C (CS vs. mean US)            | 9 shared                                                                | (Intercept) | 1              | 203    | 161.300 | <.0001   |        |
| protocol                                     |                                                                         | 1           | 39             | 1.134  | 0.2933  |          |        |
| trial                                        |                                                                         | 1           | 203            | 28.307 | 2.7249  |          |        |
| protocol:trial                               |                                                                         | 1           | 203            | 3.095  | 0.0800  |          |        |
