# Supplementary material for: Trace Conditioning in Drosophila Induces Associative Plasticity in Mushroom Body Kenyon Cells and Dopaminergic Neurons
Source: PubMed Central journal article supplement (PMC5476701; doi:10.3389/fncir.2017.00042), 2017-06-20
Supplement: Table2.pdf [file Table2.pdf]

## Supplementary Material

### Trace conditioning in *Drosophila* induces associative plasticity in mushroom body Kenyon cells and dopaminergic neurons

Kristina V. Dylla<sup>1</sup>, Georg Raiser<sup>1</sup>, C. Giovanni Galizia<sup>1</sup>, Paul Szyszka<sup>1\*</sup>

<sup>1</sup> University of Konstanz, Department of Biology, Neurobiology, 78457 Konstanz, Germany

\*Correspondence:

Paul Szyszka

paul.szyszka@uni-konstanz.de

**Supplementary Table 2. Related to Figure 3: DANs are more sensitive to current strength than KCs.** Relationship between current flow through individual flies and induced responses in DANs and KCs. Spearman rank correlation was calculated between the current flow through each fly and the US-induced normalized neuronal responses. Additionally, the slope of the regression lines was calculated. Results and the number of flies (n) are listed for all regions for DANs and KCs. Non-availability of data is indicated by gray.

| MB compartments and other regions | DANs     |        |                     |    | KCs    |        |                     |    |
|-----------------------------------|----------|--------|---------------------|----|--------|--------|---------------------|----|
|                                   | p        | $\rho$ | slope of regression | n  | p      | $\rho$ | slope of regression | n  |
| $\gamma$ 1                        | 0        | 0.636  | 0.715               | 35 | 0.4746 | 0.175  | 0.027               | 19 |
| $\gamma$ 2                        | 0.0376   | 0.33   | 0.368               | 40 | 0.0661 | 0.305  | 0.021               | 37 |
| $\gamma$ 3                        | 0.0011   | 0.508  | 0.108               | 38 | 0.006  | 0.437  | 0.046               | 38 |
| $\gamma$ 4                        | 4.00E-04 | 0.547  | 0.196               | 38 | 0.4079 | 0.138  | 0.004               | 38 |
| $\gamma$ 5                        | 0.0017   | 0.481  | 0.207               | 40 | 0.2379 | 0.196  | 0.013               | 38 |
| $\beta$ '1                        | 0.0091   | 0.454  | 0.178               | 32 | 0.0401 | 0.422  | 0.047               | 24 |
| $\beta$ '2                        | 8.00E-04 | 0.51   | 0.161               | 40 | 0.0212 | 0.373  | 0.022               | 38 |
| junction                          | 0.0052   | 0.475  | 0.321               | 33 | 0.5939 | 0.12   | 0.013               | 22 |
| $\alpha$ 1/ $\alpha$ '1           | 0.879    | -0.071 | 0.024               | 7  | 0.0666 | 0.503  | 0.052               | 14 |
| FB1                               | 0.0056   | 0.486  | 0.215               | 31 |        |        |                     |    |
| FB2                               | 0.0107   | 0.475  | 0.282               | 28 |        |        |                     |    |
| EB                                | 0.0044   | 0.583  | 0.414               | 22 |        |        |                     |    |
| $\beta$ 2                         |          |        |                     |    | 0.0567 | 0.485  | 0.519               | 16 |
| IPCs                              |          |        |                     |    | 0.4115 | 0.18   | 0.012               | 23 |
